# Supplementary material
Source: Springer Nature journal article supplement (https://www.springermedizin.de/resource/supplementary/13256_2009_1233_MOESM1_ESM.pdf/9647304)
Supplement: MOESM1 [file 9647304]

# Tacrolimus Concentration

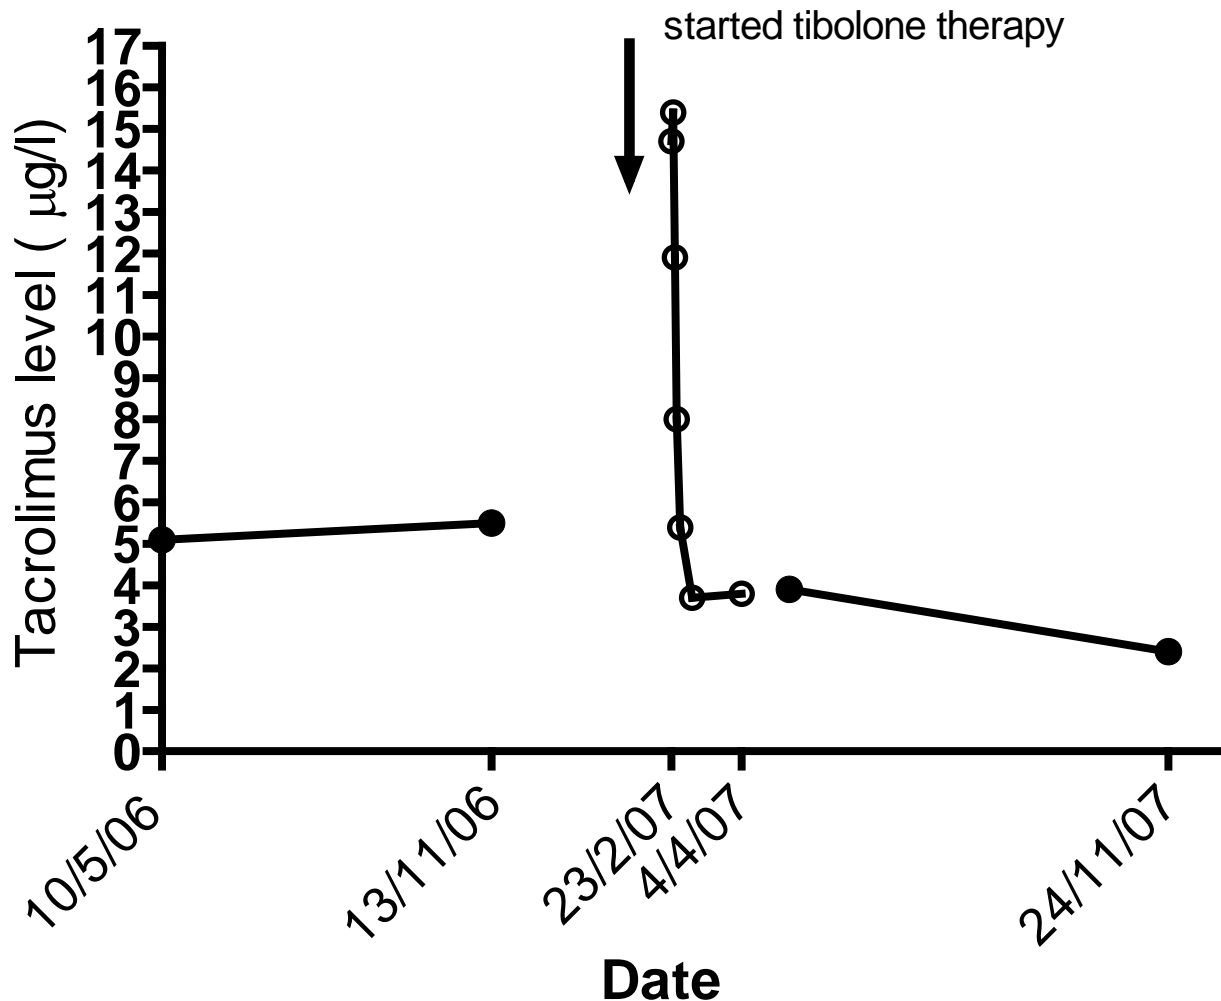

closed circles: immunoassay  
open circles: liquid chromatography - tandem mass spectrometry assay
